# Supplementary material for: Bioprospecting of Essential Oil-Bearing Plants: Rapid Screening of Volatile Organic Compounds Using Headspace Bubble-in-Drop Single-Drop Microextraction for Gas Chromatography Analysis
Source: MDPI journal article supplement (doi:10.3390/plants11202749), 2022-10-17
Supplement: s1 [file s1]

---

*Supplementary file*

# **Bioprospecting of Essential Oil-Bearing Plants: Rapid Screening of Volatile Organic Compounds Using Headspace Bubble-in-Drop Single-Drop Microextraction for Gas Chromatography Analysis**

Thabiso E. Letseka <sup>1</sup>, Ntjana J. Sepheka <sup>1</sup>, Ian A. Dubery <sup>2,\*</sup> and Mosotho J. George <sup>1,2,\*</sup>

<sup>1</sup> Department of Chemistry and Chemical Technology, National University of Lesotho, P.O. Box 180, Roma 100, Lesotho

<sup>2</sup> Department of Biochemistry, University of Johannesburg, P.O. Box 524, Auckland Park 2006, South Africa

\* Correspondence: idubery@uj.ac.za (I.A.D.); jm.george@nul.ls (M.J.G.)

---

**Table S1.** Structures of terpenes and terpenoids detected by GC-MS in the VOC fractions as samples by the BID-SDME method. The numbered chemicals correspond to that used in Table 1 in the main text. Structures were obtained from Pubchem (<https://pubchem.ncbi.nlm.nih.gov>, accessed on 10 October 2022).

|                                                                                              |                                                                                            |                                                                                                |                                                                                              |                                                                                                  |
|----------------------------------------------------------------------------------------------|--------------------------------------------------------------------------------------------|------------------------------------------------------------------------------------------------|----------------------------------------------------------------------------------------------|--------------------------------------------------------------------------------------------------|
| 1. , 6.<br>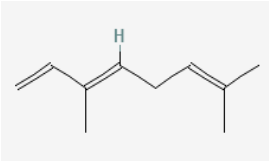 | 2.<br>    | 3.<br>       | 4.<br>    | 5.<br>        |
| 7.<br>      | 8.<br>    | 9. , 10.<br> | 11.<br>   | 12. , 13.<br> |
| 14.<br>    | 15.<br>  | 16.<br>     | 17.<br>  | 18.<br>      |
| 19.<br>   | 20.<br> | 21.<br>    | 22.<br> |                                                                                                  |
